# Supplementary material for: Organ system network analysis and biological stability in critically ill patients
Source: Springer Nature journal article supplement (doi:10.1186/s13054-019-2376-y), 2019-03-12
Supplement: MOESM1 [file 16541540]

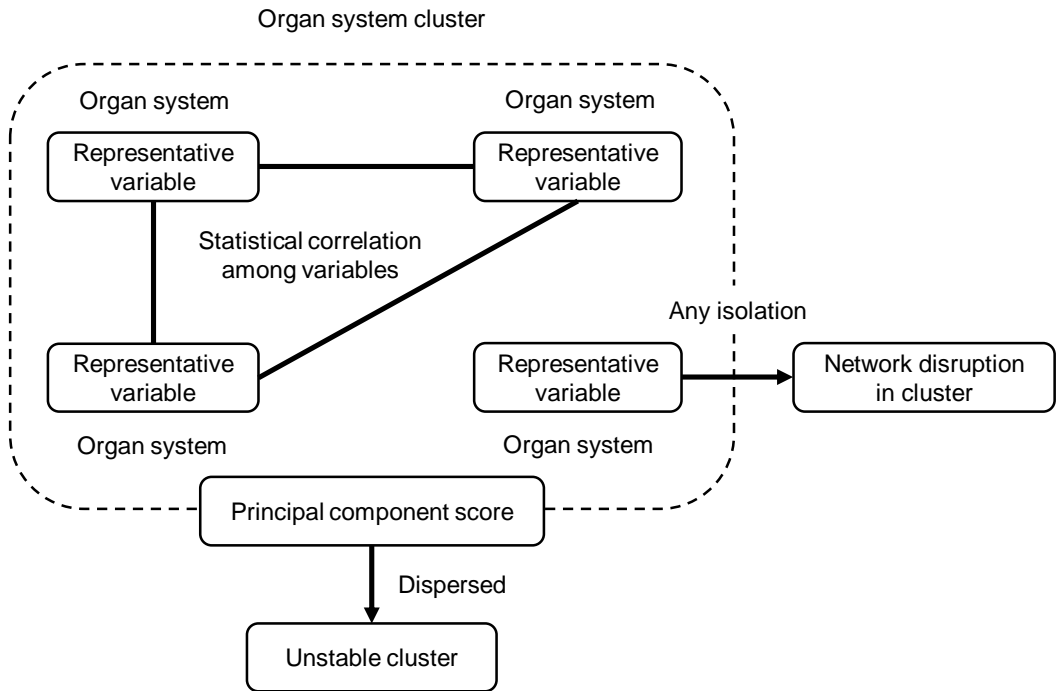

Supplemental Figure 1. Schematic view of methodology
